# Supplementary material
Source: publisher site journal article supplement (https://www.dovepress.com/article/282367)
Supplement: Supplementary file 1 [file get_supplementary_file.php]

**Supplementary Table S1** Sequences of miR-1-3p mimic, miR-1-3p inhibitor, and their

negative controls

| <b>miRNA</b>       | <b>Sequence (5'-3')</b> |
|--------------------|-------------------------|
| miR-NC             | UUCUCCGAACGUGUCACGUTT   |
| miR-1-3p mimic     | UGGAAUGUAAAGAAGUAUGUAU  |
| anti-miR-NC        | CAGUACUUUUGUGUAGUACAA   |
| miR-1-3p inhibitor | AUACAUACUUCUUUACAUUCCA  |

**Abbreviations:** miRNA, microRNA; miR-NC, miR-negative control; anti-miR-NC, the negative control of inhibitor.

**Supplementary Table S2** Primer sequences for quantitative real-time PCR

| <b>Related miRNA</b>        | <b>Primer</b> | <b>Sequence (5'-3')</b>                                |
|-----------------------------|---------------|--------------------------------------------------------|
| miR-1-3p                    | F             | CGGCTGGAATGTAAAGAAGTATGTAT                             |
|                             | Universal R   | GTGCAGGGTCCGAGGT                                       |
| U6-snRNA (internal control) | F             | CTCGCTTCGGCAGCACA                                      |
|                             | R             | AACGCTTCACGAATTTGCGT                                   |
| RT                          |               | GTCGTATCCAGTGCAGGGTCCGAGGTATTCGCACT<br>GGATACGACATACAT |
| <b>Related Gene</b>         |               | <b>Sequence (5'-3')</b>                                |
| NAMPT                       | F             | AATGTTCTCTTCACGGTGGAAAA                                |
|                             | R             | ACTGTGATTGGATACCAGGACT                                 |
| GAPDH                       | F             | TGACTTCAACAGCGACACCCA                                  |
|                             | R             | CACCCTGTT GCTGTAGCCAAA                                 |

**Abbreviations:** F, forward; R, reverse; NAMPT, nicotinamide phosphoribosyltransferase
